# Supplementary material for: Ailanthus altissima Forests Determine a Shift in Herbaceous Layer Richness: A Paired Comparison with Hardwood Native Forests in Sub-Mediterranean Europe
Source: PubMed Central journal article supplement (PMC7589998; doi:10.3390/plants9101404), 2020-10-21
Supplement: plants-09-01404-s001.pdf [file plants-09-01404-s001.pdf]

**Supplementary Materials to the paper Montecchiari, S. Tesei, G. Allegrezza, M. *Ailanthus altissima* forests determine a shift in herbaceous layer richness: a paired comparison with native forests in sub Mediterranean Europe.**

**Table S1.** A list of species recorded in the study area. Indication of percentage frequency values for each species present respectively in the *A. altissima* forest plots (%AIL) and native forest plots (%NAT), life form, Grime life strategy, and indication of nemoral status (nem\_herb). At the end of the table are indicated percentage frequencies of seedlings and saplings recorded in *A. altissima* forests and Native forests. Nomenclature follows Bartolucci et al.,2018.

| Species                                                                                | %AIL  | %NAT | Life Form | Grime Strategy | Nemoral Status |
|----------------------------------------------------------------------------------------|-------|------|-----------|----------------|----------------|
| <i>Acer campestre</i> L.                                                               | 52,6  | 63,2 | P scap    | C              |                |
| <i>Acer pseudoplatanus</i> L.                                                          | 5,3   |      | P scap    | C              |                |
| <i>Aegonychon purpureocaeruleum</i> (L.) Holub                                         |       | 10,5 | H scap    | CS             | Nem_herb       |
| <i>Ailanthus altissima</i> (Mill.) Swingle                                             | 100,0 | 15,8 | P scap    | C              |                |
| <i>Alliaria petiolata</i> (M.Bieb.) Cavara & Grande                                    | 15,8  | 15,8 | H scap    | CR             |                |
| <i>Allium</i> sp.                                                                      | 5,3   |      |           |                |                |
| <i>Anisantha sterilis</i> (L.) Nevski                                                  | 31,6  | 5,3  | T scap    | CR             |                |
| <i>Artemisia campestris</i> L.                                                         | 5,3   |      | Ch suffr  | CS             |                |
| <i>Arum italicum</i> Mill. subsp. <i>italicum</i>                                      | 5,3   | 10,5 | G rhiz    | SR             |                |
| <i>Arundo donax</i> L.                                                                 | 5,3   | 10,5 | G rhiz    | SR             |                |
| <i>Asparagus acutifolius</i> L.                                                        | 26,3  | 31,6 | G rhiz    | CS             |                |
| <i>Avena barbata</i> Pott ex Link                                                      | 5,3   |      | T scap    | SR             |                |
| <i>Ballota nigra</i> L. subsp. <i>nigra</i>                                            |       | 5,3  | H scap    | C              |                |
| <i>Bellevalia romana</i> (L.) Sweet                                                    | 5,3   |      | G bulb    | CS             |                |
| <i>Brachypodium rupestre</i> (Host) Roem. & Schult.                                    | 10,5  | 26,3 | H caesp   | CS             |                |
| <i>Brachypodium sylvaticum</i> (Huds.) P.Beauv.                                        | 15,8  | 21,1 | H caesp   | CS             |                |
| <i>Bunium bulbocastanum</i> L.                                                         | 5,3   |      | G bulb    | CSR            |                |
| <i>Campanula trachelium</i> L. subsp. <i>trachelium</i>                                |       | 5,3  | H scap    | CS             | Nem_herb       |
| <i>Carex flacca</i> Schreb. subsp. <i>flacca</i>                                       |       | 10,5 | G rhiz    | CSR            |                |
| <i>Carex pendula</i> Huds.                                                             | 5,3   | 5,3  | H caesp   | CS             | Nem_herb       |
| <i>Celtis australis</i> L. subsp. <i>australis</i>                                     |       | 5,3  | P scap    | CSR            |                |
| <i>Cercis siliquastrum</i> L. subsp. <i>siliquastrum</i>                               | 10,5  | 5,3  | P scap    | CSR            |                |
| <i>Chaerophyllum temulum</i> L.                                                        | 31,6  |      | T scap    | CR             |                |
| <i>Clematis vitalba</i> L.                                                             | 78,9  | 52,6 | P lian    | C              |                |
| <i>Clinopodium nepeta</i> (L.) Kuntze                                                  | 15,8  | 5,3  | H scap    | C              |                |
| <i>Clinopodium vulgare</i> L. subsp. <i>vulgare</i>                                    | 5,3   |      | H scap    | CS             |                |
| <i>Convolvulus arvensis</i> L.                                                         | 5,3   |      | G rhiz    | CR             |                |
| <i>Cornus sanguinea</i> L.                                                             | 47,4  | 36,8 | P caesp   | C              |                |
| <i>Corylus avellana</i> L.                                                             | 5,3   |      | P caesp   | C              |                |
| <i>Crataegus laevigata</i> (Poir.) DC.                                                 |       | 10,5 | P caesp   | C              |                |
| <i>Crataegus monogyna</i> Jacq.                                                        | 57,9  | 68,4 | P caesp   | C              |                |
| <i>Cruciata glabra</i> (L.) C.Bauhin ex Opiz                                           | 10,5  | 5,3  | H scap    | CSR            |                |
| <i>Cruciata laevipes</i> Opiz                                                          | 5,3   |      | H scap    | CSR            |                |
| <i>Cyclamen hederifolium</i> Aiton                                                     |       | 10,5 | G bulb    | CSR            | Nem_herb       |
| <i>Cyclamen repandum</i> Sm. subsp. <i>repandum</i>                                    |       | 5,3  | G bulb    | CSR            | Nem_herb       |
| <i>Cytisophyllum sessilifolium</i> (L.) O.Lang                                         |       | 5,3  | P caesp   | CSR            |                |
| <i>Dactylis glomerata</i> L. subsp. <i>glomerata</i>                                   | 10,5  | 5,3  | H caesp   | C              |                |
| <i>Daucus carota</i> L. subsp. <i>carota</i>                                           | 5,3   |      | H bien    | CR             |                |
| <i>Dioscorea communis</i> (L.) Caddick & Wilkin                                        | 5,3   | 5,3  | G rad     | C              |                |
| <i>Elymus repens</i> (L.) Gould subsp. <i>repens</i>                                   | 5,3   | 10,5 | G rhiz    | S              |                |
| <i>Emerus major</i> Mill. subsp. <i>emeroides</i> (Boiss. & Spruner) Soldano & F.Conti |       | 10,5 | Np        | CS             |                |

|                                                                        |      |      |          |     |          |
|------------------------------------------------------------------------|------|------|----------|-----|----------|
| <i>Euonymus europaeus</i> L.                                           | 47,4 | 47,4 | P caesp  | C   |          |
| <i>Ficus carica</i> L.                                                 | 5,3  | 10,5 | P scap   | CS  |          |
| <i>Fraxinus ornus</i> L. subsp. <i>ornus</i>                           | 26,3 | 36,8 | P scap   | C   |          |
| <i>Galium album</i> Mill. subsp. <i>album</i>                          | 15,8 | 10,5 | H scap   | C   |          |
| <i>Galium aparine</i> L.                                               | 21,1 | 5,3  | T scap   | CR  |          |
| <i>Galium mollugo</i> L.                                               | 5,3  |      | H scap   | C   | Nem_herb |
| <i>Geranium dissectum</i> L.                                           | 5,3  |      | T scap   | CR  |          |
| <i>Geranium robertianum</i> L.                                         |      | 5,3  | T scap   | CSR | Nem_herb |
| <i>Geranium</i> sp. pl.                                                | 5,3  |      |          |     |          |
| <i>Geum urbanum</i> L.                                                 | 5,3  |      | H scap   | CSR |          |
| <i>Hedera helix</i> L. subsp. <i>helix</i>                             | 84,2 | 89,5 | P lian   | CS  |          |
| <i>Helleborus foetidus</i> L. subsp. <i>foetidus</i>                   | 5,3  |      | Ch suffr | CS  |          |
| <i>Helleborus viridis</i> L. subsp. <i>bocconeii</i> (Ten.)<br>Peruzzi |      | 5,3  | G rhiz   | CS  | Nem_herb |
| <i>Inula conyzae</i> (Griess.) DC.                                     | 5,3  |      | H bien   | CS  |          |
| <i>Iris germanica</i> L. s.l.                                          | 5,3  |      | G rhiz   | C   | Nem_herb |
| <i>Juglans regia</i> L.                                                | 5,3  | 10,5 | P scap   | C   |          |
| <i>Lamium maculatum</i> L.                                             | 5,3  |      | H scap   | CSR |          |
| <i>Lamium</i> sp.                                                      | 15,8 | 15,8 |          |     |          |
| <i>Lapsana communis</i> L. subsp. <i>communis</i>                      | 5,3  |      | T scap   | CR  |          |
| <i>Laurus nobilis</i> L.                                               | 52,6 | 47,4 | P caesp  | C   |          |
| <i>Ligustrum lucidum</i> W.T.Aiton                                     | 5,3  | 10,5 | Np       | CS  |          |
| <i>Ligustrum vulgare</i> L.                                            | 15,8 | 36,8 | Np       | C   |          |
| <i>Lonicera caprifolium</i> L.                                         | 5,3  | 5,3  | P lian   | C   |          |
| <i>Lonicera etrusca</i> Santi                                          |      | 21,1 | P lian   | C   |          |
| <i>Lunaria annua</i> L.                                                | 5,3  | 5,3  | H scap   | CR  |          |
| <i>Malus</i> sp.                                                       | 5,3  |      | P caesp  |     |          |
| <i>Melica uniflora</i> Retz.                                           |      | 5,3  | H caesp  | C   | Nem_herb |
| <i>Melissa officinalis</i> L. s.l.                                     | 47,4 | 15,8 | H scap   | C   |          |
| <i>Mentha spicata</i> L.                                               | 5,3  |      | H scap   | C   |          |
| <i>Narcissus</i> sp.                                                   | 5,3  |      |          |     |          |
| <i>Olea europaea</i> L.                                                | 21,1 | 5,3  | P caesp  | CS  |          |
| <i>Origanum vulgare</i> L. subsp. <i>vulgare</i>                       | 5,3  |      | H scap   | CSR |          |
| <i>Orobanche minor</i> Sm.                                             |      | 10,5 | T scap   | SC  | Nem_herb |
| <i>Ostrya carpinifolia</i> Scop.                                       |      | 31,6 | P caesp  | C   |          |
| <i>Osyris alba</i> L.                                                  | 10,5 | 15,8 | Np       | SR  |          |
| <i>Paliurus spina-christi</i> Mill.                                    | 15,8 | 10,5 | P caesp  | CS  |          |
| <i>Parietaria judaica</i> L.                                           | 5,3  |      | H scap   | CSR |          |
| <i>Petrosedum rupestre</i> (L.) P.V.Heath                              |      | 5,3  | Ch succ  | SR  |          |
| <i>Phillyrea latifolia</i> L.                                          |      | 10,5 | P caesp  | CS  |          |
| <i>Picris hieracioides</i> L. subsp. <i>hieracioides</i>               | 10,5 |      | H scap   | CSR |          |
| <i>Pistacia terebinthus</i> L. subsp. <i>terebinthus</i>               |      | 5,3  | P caesp  | CS  |          |
| <i>Poa trivialis</i> L.                                                | 15,8 |      | H caesp  | CSR |          |
| <i>Populus alba</i> L.                                                 | 5,3  |      | P scap   | C   |          |
| <i>Populus canescens</i> (Aiton) Sm.                                   |      | 5,3  | P scap   | C   |          |
| <i>Populus nigra</i> L. subsp. <i>nigra</i>                            | 10,5 | 5,3  | P scap   | C   |          |
| <i>Primula vulgaris</i> Huds. subsp. <i>vulgaris</i>                   |      | 10,5 | H ros    | CSR | Nem_herb |
| <i>Prunus avium</i> (L.) L.                                            | 21,1 | 36,8 | P scap   | C   |          |
| <i>Prunus domestica</i> L.                                             | 10,5 | 5,3  | P caesp  | C   |          |
| <i>Prunus spinosa</i> L. subsp. <i>spinosa</i>                         | 42,1 | 15,8 | P caesp  | C   |          |
| <i>Pseudotsurritus turrata</i> (L.) Al-Shehbaz                         | 5,3  | 15,8 | H bien   | CR  |          |
| <i>Pyrus communis</i> L. subsp. <i>pyraster</i> (L.) Ehrh.             | 5,3  | 5,3  | P scap   | C   |          |
| <i>Quercus cerris</i> L.                                               |      | 10,5 | P scap   | C   |          |
| <i>Quercus ilex</i> L. subsp. <i>ilex</i>                              | 5,3  | 10,5 | P scap   | C   |          |
| <i>Quercus pubescens</i> Willd. subsp. <i>pubescens</i>                | 36,8 | 63,2 | P caesp  | C   |          |
| <i>Rhus coriaria</i> L.                                                |      | 5,3  | P caesp  | C   |          |

|                                                                       |      |      |          |     |          |
|-----------------------------------------------------------------------|------|------|----------|-----|----------|
| <i>Robinia pseudoacacia</i> L.                                        | 15,8 | 36,8 | P caesp  | C   |          |
| <i>Rosa canina</i> L.                                                 | 10,5 | 15,8 | Np       | CRS |          |
| <i>Rosa sempervirens</i> L.                                           | 5,3  |      | Np       | C   |          |
| <i>Rosa</i> sp.                                                       |      | 5,3  | Np       |     |          |
| <i>Rubia peregrina</i> L.                                             | 26,3 | 36,8 | P lian   | CS  |          |
| <i>Rubus caesius</i> L.                                               | 5,3  | 5,3  | Np       | C   |          |
| <i>Rubus ulmifolius</i> Schott                                        | 84,2 | 68,4 | Np       | CS  |          |
| <i>Rumex sanguineus</i> L.                                            | 5,3  |      | H scap   | CS  |          |
| <i>Ruscus aculeatus</i> L.                                            | 5,3  | 10,5 | Ch frut  | S   | Nem_herb |
| <i>Sambucus nigra</i> L.                                              | 42,1 | 15,8 | P caesp  | C   |          |
| <i>Silene italica</i> (L.) Pers.                                      | 10,5 | 5,3  | H ros    | C   |          |
| <i>Silene latifolia</i> Poir.                                         | 5,3  |      | H bien   | C   |          |
| <i>Sonchus asper</i> (L.) Hill subsp. <i>asper</i>                    | 5,3  |      | T scap   | CR  |          |
| <i>Sorbus domestica</i> L.                                            |      | 5,3  | P scap   | C   |          |
| <i>Spartium junceum</i> L.                                            | 5,3  |      | P caesp  | CR  |          |
| <i>Stachys sylvatica</i> L.                                           | 5,3  | 5,3  | H scap   | CS  |          |
| <i>Stellaria media</i> (L.) Vill. subsp. <i>media</i>                 | 10,5 |      | T rept   | CR  |          |
| <i>Symphytotrichum squamatum</i> (Spreng.)<br>G.L.Nesom               | 5,3  |      | T scap   | CS  |          |
| <i>Teucrium chamaedrys</i> L. subsp. <i>chamaedrys</i>                |      | 5,3  | Ch suffr | CSR |          |
| <i>Torilis arvensis</i> (Huds.) Link subsp. <i>arvensis</i>           | 21,1 |      | T scap   | CR  |          |
| <i>Ulmus minor</i> Mill. subsp. <i>minor</i>                          | 36,8 | 52,6 | P caesp  | C   |          |
| <i>Umbilicus horizontalis</i> (Guss.) DC.                             | 5,3  |      | G bulb   | SR  |          |
| <i>Urtica dioica</i> L. subsp. <i>dioica</i>                          | 26,3 | 5,3  | H scap   | C   |          |
| <i>Verbascum thapsus</i> L. subsp. <i>thapsus</i>                     | 5,3  |      | H bien   | C   |          |
| <i>Viburnum tinus</i> L. subsp. <i>tinus</i>                          | 5,3  | 10,5 | P caesp  | CSR |          |
| <i>Viola alba</i> Besser subsp. <i>dehnhardtii</i> (Ten.)<br>W.Becker | 15,8 | 21,1 | H ros    | CSR | Nem_herb |
| <i>Vitis vinifera</i> L.                                              |      | 10,5 | P lian   | C   |          |
| <b>Seedlings and Saplings</b>                                         |      |      |          |     |          |
| <i>Ailanthus altissima</i> (Mill.) Swingle pl                         | 73,7 | 5,3  |          |     |          |
| <i>Laurus nobilis</i> L. pl                                           | 31,6 | 31,6 |          |     |          |
| <i>Quercus pubescens</i> Willd. pl                                    | 26,3 | 47,4 |          |     |          |
| <i>Acer campestre</i> L. pl                                           | 21,1 | 36,8 |          |     |          |
| <i>Ulmus minor</i> Miller pl                                          | 5,3  | 21,1 |          |     |          |
| <i>Fraxinus ornus</i> L. pl                                           | 5,3  | 15,8 |          |     |          |
| <i>Ligustrum vulgare</i> L. pl                                        | 5,3  | 10,5 |          |     |          |
| <i>Pyrus communis</i> L. pl                                           | 5,3  | 5,3  |          |     |          |
| <i>Quercus ilex</i> L. pl                                             | 5,3  | 5,3  |          |     |          |
| <i>Sambucus nigra</i> L. pl                                           | 15,8 | 5,3  |          |     |          |
| <i>Crataegus monogyna</i> Jacq. pl                                    | 21,1 |      |          |     |          |
| <i>Euonymus europaeus</i> L. pl                                       | 15,8 |      |          |     |          |
| <i>Ligustrum lucidum</i> W.T.Aiton pl                                 | 5,3  |      |          |     |          |
| <i>Populus alba</i> L. pl                                             | 5,3  |      |          |     |          |
| <i>Cercis siliquastrum</i> L. pl                                      |      | 5,3  |          |     |          |
| <i>Cornus sanguinea</i> L. pl                                         |      | 5,3  |          |     |          |
| <i>Ostrya carpinifolia</i> Scop. pl                                   |      | 5,3  |          |     |          |
| <i>Populus canescens</i> (Aiton) Sm. pl                               |      | 5,3  |          |     |          |
| <i>Prunus avium</i> (L.) L. pl                                        |      | 5,3  |          |     |          |
| <i>Quercus cerris</i> L. pl                                           |      | 5,3  |          |     |          |
| <i>Rosa canina</i> L. pl.                                             |      | 5,3  |          |     |          |
| <i>Sorbus domestica</i> L. pl.                                        |      | 5,3  |          |     |          |
| <i>Viburnum tinus</i> L. pl                                           |      | 5,3  |          |     |          |

**Table S2.** Minimum, average and maximum values of the topographic characteristics and ecological variables surveyed in the *A. altissima* forests and native forests.

|                         | Ailanthus Forests |         |        | Native Forests |         |        |
|-------------------------|-------------------|---------|--------|----------------|---------|--------|
|                         | Min               | Average | Max    | Min            | Average | Max    |
| Alt (m slm)             | 9                 | 194     | 462    | 18,89          | 192     | 463    |
| Slope (°)               | 1                 | 10      | 23     | 0              | 10      | 33     |
| Northness               | -1                | 0       | 1      | -1             | 0       | 1      |
| Sup (m2)                | 215               | 833     | 3045   | -              | >2000   | -      |
| Canopy_cover (%)        | 74                | 88      | 94     | 61             | 88      | 97     |
| Canopy_height (m)       | 7,4               | 13,4    | 21,6   | 6              | 14,5    | 24,8   |
| PAR_chest (µmol m-2s-1) | 3,2               | 25,8    | 97,1   | 7,3            | 28,2    | 64,4   |
| PAR_soil (µmol m-2s-1)  | 2,2               | 21,4    | 125,5  | 6,1            | 19,8    | 49,8   |
| PAR_out (µmol m-2s-1)   | 83,1              | 1349,2  | 1906,8 | 83,1           | 1213,1  | 1863,3 |
| T_in (°C)               | 15,7              | 18,9    | 22,3   | 15,8           | 18,4    | 20,2   |
| T_out (°C)              | 18,1              | 21,7    | 25,6   | 17,4           | 21,2    | 29,2   |
| T_air (°C)              | 19,2              | 25,8    | 29,5   | 19             | 25,4    | 32,3   |
| Δ PAR_chest             | 61,2              | 1292,7  | 1875,3 | 71,1           | 1184,9  | 1854,5 |
| Δ PAR_soil              | 66,2              | 1297,1  | 1874,1 | 75,5           | 1193,3  | 1856   |
| Δ T                     | -0,5              | 2,7     | 7,9    | -0,7           | 2,8     | 9,5    |
| N_tot (g/Kg)            | 1,5               | 2,8     | 4,8    | 1,6            | 3,7     | 6      |
| C_tot (g/Kg)            | 5,7               | 20,8    | 36,9   | 11,1           | 32,2    | 56,9   |
| C/N (g/Kg)              | 3,8               | 7,3     | 9      | 6,9            | 8,5     | 10,2   |
| pH                      | 7,4               | 7,8     | 8,1    | 6,2            | 7,6     | 7,9    |

**Table S3.** Geographical coordinates of the vegetation plots. Coordinates system WGS84-UTM33.

| ID     | East   | North   |
|--------|--------|---------|
| 5      | 385604 | 4814288 |
| 7      | 376931 | 4799761 |
| 8      | 375047 | 4796378 |
| 9      | 346354 | 4816786 |
| 11     | 339474 | 4796335 |
| 12     | 337269 | 4859623 |
| 14     | 375354 | 4813757 |
| 15     | 372499 | 4805753 |
| 16     | 337494 | 4796349 |
| 17     | 334511 | 4797268 |
| 18     | 333757 | 4797518 |
| 19     | 356709 | 4779328 |
| 20     | 349941 | 4777643 |
| 21     | 338904 | 4811611 |
| 22     | 341462 | 4824278 |
| 23     | 337132 | 4853921 |
| 25     | 337141 | 4848681 |
| 28     | 329718 | 4844106 |
| 29     | 321483 | 4839316 |
| 5 Nat  | 385786 | 4813831 |
| 7 Nat  | 376900 | 4799729 |
| 8 Nat  | 375913 | 4797043 |
| 9 Nat  | 346288 | 4816722 |
| 11 Nat | 334511 | 4797268 |
| 12 Nat | 337061 | 4859794 |
| 14 Nat | 375487 | 4813711 |
| 15 Nat | 372552 | 485785  |
| 16 Nat | 337596 | 4796311 |
| 17 Nat | 334874 | 4797533 |
| 18 Nat | 333769 | 4797522 |
| 19 Nat | 356776 | 4779481 |

|        |        |         |
|--------|--------|---------|
| 20 Nat | 350414 | 4777647 |
| 21 Nat | 338860 | 4811557 |
| 22 Nat | 341453 | 4824259 |
| 23 Nat | 337092 | 4853935 |
| 25 Nat | 337222 | 4848771 |
| 28 Nat | 329777 | 4844203 |
| 29 Nat | 321615 | 4839182 |

---
